# Supplementary material
Source: PubMed Central journal article supplement (PMC3637935)
Supplement: NIHMS453914-supplement-supplement_1.pdf [file NIHMS453914-supplement-supplement_1.pdf]

**Supplementary Digital Content 1.** Etravirine resistance and clinical associations. The Tibotec Etravirine Weighted Genotype Score was used to classify etravirine susceptibility. Intermediate and full resistance are classified together under “resistant”. Mean values are presented. Non-parametric Mann-Whitney test was performed for all variables except age (t-test).

|                                                               | <b>Susceptible</b><br>(n=54) | <b>Resistant</b><br>(n=38) | <b><i>p</i> values</b> |
|---------------------------------------------------------------|------------------------------|----------------------------|------------------------|
| Age (years)                                                   | 40.2                         | 38.6                       | 0.48                   |
| CD4 Count (cells/mm <sup>3</sup> )                            | 226                          | 228                        | 0.91                   |
| Viral load (copies/ml)                                        | 238,121                      | 943,859                    | 0.01*                  |
| Time since diagnosis (in months)                              | 53.65                        | 63.87                      | 0.17                   |
| Time since antiretroviral initiation (in months)              | 28.50                        | 35.87                      | 0.03*                  |
| Adherence (% pills taken correctly during the previous month) | 91.67                        | 91.92                      | 0.67                   |
